# Supplementary material for: Role of dermatomes in the determination of therapeutic characteristics of channel acupoints: a similarity-based analysis of data compiled from literature
Source: PubMed Central journal article supplement (PMC4129182; doi:10.1186/1749-8546-8-24), 2013-12-17
Supplement: 1749-8546-8-24-S2.pdf [file 1749-8546-8-24-S2.pdf]

# Therapeutic characteristics of channel acupuncture points are associated to dermatomes: A similarity-based analysis from literature compilation

Additional file - Maple worksheet for data analysis

Last update: March 16, 2013.

PS: Most routines may take several hours to complete. The complete worksheet may take several days to complete.

```
> # PART 1A: DESCRIPTIVE ANALYSIS OF ACUPOINTS DATASET:
DATASET CONTENT (N AND %)
> # Loading packages...
> restart :
> with(ExcelTools) :
with(ListTools) :
with(StringTools) :
with(ArrayTools) :
interface(warnlevel = 0) :
> acupoints := 361 :
> colunas := Array(["A", "B", "C", "D", "E", "F", "G", "H", "I", "J", "K", "L", "M", "N",
"O", "P", "Q", "R", "S"]) :
> printlevel := 1 :
print("Reading data..") :
for i from 1 by 1 to ArrayNumElems(colunas) do
temp1 := "" :
L := "1" : C := colunasi : cell := Join([C, L, ":", C, L], "") :
labels := (Import("Additional file 1.xls", "Acupoints", cell))[1][1] :
for j from 2 by 1 to acupoints + 1 do
L := convert(j, string) : C := colunasi : cell := Join([C, L, ":", C, L], "") :
temp2 := (Import("Additional file 1.xls", "Acupoints", cell))[1][1] :
if temp2 = "-" then temp1 := temp1 : else temp1 := Join([convert(temp1, string), " ",
convert(temp2, string)]) : end if:
end do:
temp3 := convert(Split(DeleteSpace(temp1), " "), Array) :
temp3 := temp32..ArrayNumElems(temp3) :
n := ArrayNumElems(convert(MakeUnique(convert(temp3, list)), Array)) :
print(Join([convert(labels, string), ":", convert(n, string)])) :
output := Vectorrow([labels, n]) :
L := convert(i, string) : cell := Join(["A", L, ":", "B", L], "") :
Export(output, "Results.xls", "descriptive", cell) :
end do:
print("End of computation.") :
```

```

> # PART 1B: DESCRIPTIVE ANALYSIS OF ACUPOINTS DATASET:
  # FREQUENCY AND CO-OCCURRENCE OF UNIQUE AND DUAL TERMS
> # Loading packages...
> restart :
> with(ExcelTools) :
  with(ListTools) :
  with(StringTools) :
  with(ArrayTools) :
  interface(warnlevel = 0) :
  Digits := 10 :
> acupoints := 361 :
> # Identification of top-five single terms: Traditional actions
> columnas := Array(["R"]) :
  termos5 := Array(1..5) :
> printlevel := 1 :
for i from 1 by 1 to ArrayNumElems(columnas) do
  print("Reading data and generating a list of unique terms...") :
  temp1 := "" :
  for j from 2 by 1 to acupoints + 1 do
    L := convert(j, string) : C := columnas, cell := Join([C, L, ":", C, L], "") :
    temp2 := (Import("Additional file 1.xls", "Acupoints", cell))[1][1] :
    if temp2 = "-" then temp1 := temp1 : else temp1 := Join([convert(temp1, string), " ",
      convert(temp2, string)]) : end if:
  end do:
  temp3 := MakeUnique(convert(convert(Split(DeleteSpace(temp1), ","), Array), list)) :
  temp4 := convert(Split(DeleteSpace(temp1), ","), Array) :

  print(Join(["Completed... Starting data analysis of",
    convert(ArrayNumElems(convert(temp3, Array)) - 1, string), "unique terms..."])) :
  for k from 1 by 1 to ArrayNumElems(convert(temp3, Array)) do
    n := 0 :
    for q from 1 by 1 to ArrayNumElems(convert(temp4, Array)) do
      if temp3k = temp4q then n := n + 1 else n := n end if:
    end do:
    output := Vectorrow([temp3k, n]) :
    L := convert(k, string) : cell := Join(["A", L, ":", "B", L], "") :
    Export(output, "Results.xls", "list1", cell) :
  end do:

  print("Completed... Starting data ranking of top-five terms...") :
  cell := Join(["B1:B", convert(ArrayNumElems(convert(temp3, Array)), string)], "") :
  dados1 := Import("Results.xls", "list1", cell) :
  dados2 := Statistics[Sort](Reshape(dados1, ArrayNumElems(convert(temp3,
    Array))), order = descending) :
  cell := Join(["A1:A", convert(ArrayNumElems(convert(temp3, Array)), string)], "") :
  dados3 := Reshape(Import("Results.xls", "list1", cell),
    ArrayNumElems(convert(temp3, Array))) :
  dados5 := dados21..5 :

```

```

dados6 :=  $\frac{\textit{dados5}}{\textit{acupoints}} \cdot 100$  :
dados7 := convert(Reshape(dados1, ArrayNumElems (convert(temp3, Array))), list) :
for q from 1 by 1 to 5 do
  indice := (FindMaximalElement(dados7, position))[2] :
  termos5q := dados3indice :
  dados7 := convert(dados7, Array) :
  dados7indice := -1 :
  dados7 := convert(dados7, list) :
end do:
end do:
dados5; dados6; termos5;
print(Join(["Completed... Total of", convert(k - 2, string), "unique terms ranked."])) :
print("End of computation.") :
> # Identification of top-five single terms: Contemporary indications
> colunas := Array(["S"]) :
  termos5 := Array(1..5) :
> printlevel := 1 :
for i from 1 by 1 to ArrayNumElems(colunas) do
  print("Reading data and generating a list of unique terms...") :
  temp1 := "" :
  for j from 2 by 1 to acupoints + 1 do
    L := convert(j, string) : C := colunasi : cell := Join([C, L, ":", C, L], "") :
    temp2 := (Import("Additional file 1.xls", "Acupoints", cell))[1][1] :
    if temp2 = "-" then temp1 := temp1 : else temp1 := Join([convert(temp1, string), " ", convert(temp2, string)]) : end if:
  end do:
  temp3 := MakeUnique(convert(convert(Split(DeleteSpace(temp1), ","), Array), list)) :
  temp4 := convert(Split(DeleteSpace(temp1), ","), Array) :

  print(Join(["Completed... Starting data analysis of",
    convert(ArrayNumElems (convert(temp3, Array)) - 1, string), "unique terms..."])) :
  for k from 1 by 1 to ArrayNumElems (convert(temp3, Array)) do
    n := 0 :
    for q from 1 by 1 to ArrayNumElems (convert(temp4, Array)) do
      if temp3k = temp4q then n := n + 1 else n := n end if:
    end do:
    output := Vectorrow([temp3k n]) :
    L := convert(k, string) : cell := Join(["A", L, ":", "B", L], "") :
    Export(output, "Results.xls", "list2", cell) :
  end do:

  print("Completed... Starting data ranking of top-five terms...") :
  cell := Join(["B1:B", convert(ArrayNumElems (convert(temp3, Array)), string), ""]) :
  dados1 := Import("Results.xls", "list2", cell) :
  dados2 := Statistics[Sort](Reshape(dados1, ArrayNumElems (convert(temp3, Array))), order = descending) :
  cell := Join(["A1:A", convert(ArrayNumElems (convert(temp3, Array)), string), ""]) :
  dados3 := Reshape(Import("Results.xls", "list2", cell),

```

```

    ArrayNumElems (convert(temp3, Array))) :
    dados5 := dados21..5 :
    dados6 :=  $\frac{\text{dados5}}{\text{acupoints}} \cdot 100$  :
    dados7 := convert(Reshape(dados1, ArrayNumElems (convert(temp3, Array))), list) :
for q from 1 by 1 to 5 do
    indice := (FindMaximalElement(dados7, position))[2] :
    termos5q := dados3indice :
    dados7 := convert(dados7, Array) :
    dados7indice := -1 :
    dados7 := convert(dados7, list) :
end do:
end do:
    dados5; dados6; termos5;
    print(Join(["Completed... Total of", convert(k - 2, string), "unique terms ranked."])) :
    print("End of computation.") :
> # Identification of top-five pairs of terms: Traditional vs.
  Traditional
> colunas := Array(["R"]) :
  termos5 := Array(1..5) :
> printlevel := 1 :
for i from 1 by 1 to ArrayNumElems (colunas) do
    print("Reading data and determining the maximum size of the list of pairs of terms (including
      repetitions)...") :
    N := 0 :
    for j from 2 by 1 to acupoints + 1 do
      L := convert(j, string) : C := colunasi : cell := Join([C, L, ":", C, L], "") :
      temp22 := (Import("Additional file 1.xls", "Acupoints", cell))[1][1] :
      if temp22 = "-" then temp11 := temp11 : else temp11 := convert(temp22, string) end
      if:
      temp00 := MakeUnique(convert(convert(Split(DeleteSpace(temp11), ","), Array),
        list)) :
      if ArrayNumElems (convert(temp00, Array)) = 0 then N := N :
      elif ArrayNumElems (convert(temp00, Array)) = 1 then N := N + 1 : else N := N
        +  $\frac{(\text{ArrayNumElems}(\text{convert}(\text{temp00}, \text{Array}))!) }{((\text{ArrayNumElems}(\text{convert}(\text{temp00}, \text{Array})) - 2)! \cdot 2!}$  : end if:
    end do:

    print(Join(["Completed. Reading data and generating a list of pairs from", convert(N,
      string), "terms (including repetitions)..."])) :
    K := 1 :
    Y := Array(1..N) :
    for j from 2 by 1 to acupoints + 1 do
      L := convert(j, string) : C := colunasi : cell := Join([C, L, ":", C, L], "") :
      temp2 := (Import("Additional file 1.xls", "Acupoints", cell))[1][1] :
      if temp2 = "-" then temp1 := temp1 : else temp1 := convert(temp2, string) : end if:
      temp0 := MakeUnique(convert(convert(Split(DeleteSpace(temp1), ","), Array),
        list)) :
      for ii from 1 by 1 to (ArrayNumElems (convert(temp0, Array))) - 1 do
        for jj from ii + 1 by 1 to ArrayNumElems (convert(temp0, Array)) do

```

```

a := min(temp0ii, temp0jj) :
b := max(temp0ii, temp0jj) :
YK := Join([a, "-", b]) :
K := K + 1 :

```

**end do:**

**end do:**

**end do:**

```
temp3 := MakeUnique(convert(Y, list)) :
```

```
temp4 := Y :
```

```
print(Join(["Completed... Starting data analysis of",
convert(ArrayNumElems(convert(temp3, Array)), string), "unique pairs of terms..."]
):
```

```
for k from 1 by 1 to ArrayNumElems(convert(temp3, Array)) do
```

```
n := 0 :
```

```
for q from 1 by 1 to ArrayNumElems(convert(temp4, Array)) do
```

```
if temp3k = temp4q then n := n + 1 else n := n end if:
```

**end do:**

```
output := Vectorrow([temp3k n]) :
```

```
L := convert(k, string) : cell := Join(["A", L, ":", "B", L], "") :
```

```
Export(output, "Results.xls", "list3", cell) :
```

**end do:**

```
print("Completed... Starting data ranking of top-five pairs of unique terms...") :
```

```
cell := Join(["B1:B", convert(ArrayNumElems(convert(temp3, Array)), string)], "") :
```

```
dados1 := Import("Results.xls", "list3", cell) :
```

```
dados2 := Statistics[Sort](Reshape(dados1, ArrayNumElems(convert(temp3,
Array))), order = descending) :
```

```
cell := Join(["A1:A", convert(ArrayNumElems(convert(temp3, Array)), string)], "") :
```

```
dados3 := Reshape(Import("Results.xls", "list3", cell),
```

```
ArrayNumElems(convert(temp3, Array))) :
```

```
dados5 := dados21..5 :
```

```
dados6 :=  $\frac{\text{dados5}}{\text{acupoints}} \cdot 100$  :
```

```
dados7 := convert(Reshape(dados1, ArrayNumElems(convert(temp3, Array))), list) :
```

```
for q from 1 by 1 to 5 do
```

```
indice := (FindMaximalElement(dados7, position))[2] :
```

```
termos5q := dados3indice :
```

```
dados7 := convert(dados7, Array) :
```

```
dados7indice := -1 :
```

```
dados7 := convert(dados7, list) :
```

**end do:**

**end do:**

```
dados5; dados6; termos5;
```

```
print(Join(["Completed... Total of", convert(k - 2, string),
"unique pairs of terms ranked."])) :
```

```
print("End of computation.") :
```

```
> # Identification of top-five pairs of terms: Contemporary vs.
Contemporary
```

```

> colunas := Array(["S"]) :
termos5 := Array(1..5) :
> printlevel := 1 :
for i from 1 by 1 to ArrayNumElems(colunas) do
  print("Reading data and determining the maximum size of the list of pairs of terms
    (including repetitions)...") :
  N := 0 :
  for j from 2 by 1 to acupoints + 1 do
    L := convert(j, string) : C := colunasi : cell := Join([C, L, ":", C, L], "") :
    temp22 := (Import("Additional file 1.xls", "Acupoints", cell))[1][1] :
    if temp22 = "-" then temp11 := temp11 : else temp11 := convert(temp22, string) end
    if:
      temp00 := MakeUnique(convert(convert(Split(DeleteSpace(temp11), ","), Array),
        list)) :
      if ArrayNumElems(convert(temp00, Array)) = 0 then N := N :
      elif ArrayNumElems(convert(temp00, Array)) = 1 then N := N + 1 : else N := N
        +  $\frac{(\text{ArrayNumElems}(\text{convert}(\text{temp00}, \text{Array}))!}{((\text{ArrayNumElems}(\text{convert}(\text{temp00}, \text{Array})) - 2)! \cdot 2!}$  : end if:
    end do:

  print(Join(["Completed. Reading data and generating a list of pairs from", convert(N,
    string), "terms (including repetitions)..."])) :
  K := 1 :
  Y := Array(1..N) :
  for j from 2 by 1 to acupoints + 1 do
    L := convert(j, string) : C := colunasi : cell := Join([C, L, ":", C, L], "") :
    temp2 := (Import("Additional file 1.xls", "Acupoints", cell))[1][1] :
    if temp2 = "-" then temp1 := temp1 : else temp1 := convert(temp2, string) : end if:
    temp0 := MakeUnique(convert(convert(Split(DeleteSpace(temp1), ","), Array),
      list)) :
    for ii from 1 by 1 to (ArrayNumElems(convert(temp0, Array)) - 1) do
      for jj from ii + 1 by 1 to ArrayNumElems(convert(temp0, Array)) do
        a := min(temp0ii, temp0jj) :
        b := max(temp0ii, temp0jj) :
        YK := Join([a, "-", b]) :
        K := K + 1 :
      end do:
    end do:
  end do:
  temp3 := MakeUnique(convert(Y, list)) :
  temp4 := Y :

  print(Join(["Completed... Starting data analysis of",
    convert(ArrayNumElems(convert(temp3, Array)), string), "unique pairs of terms..."])) :
  for k from 1 by 1 to ArrayNumElems(convert(temp3, Array)) do
    n := 0 :
    for q from 1 by 1 to ArrayNumElems(convert(temp4, Array)) do
      if temp3k = temp4q then n := n + 1 else n := n end if:
    end do:
  end do:

```

```

output := Vectorrow( [ temp3k, n ] ) :
L := convert(k, string) : cell := Join( ["A", L, ":", "B", L], "" ) :
Export(output, "Results.xls", "list4", cell) :
end do:

print("Completed... Starting data ranking of top-five pairs of unique terms...") :
cell := Join( ["B1:B", convert(ArrayNumElems(convert(temp3, Array)), string)], "" ) :
dados1 := Import("Results.xls", "list4", cell) :
dados2 := Statistics[Sort](Reshape(dados1, ArrayNumElems(convert(temp3,
Array))), order = descending) :
cell := Join( ["A1:A", convert(ArrayNumElems(convert(temp3, Array)), string)], "" ) :
dados3 := Reshape(Import("Results.xls", "list4", cell),
ArrayNumElems(convert(temp3, Array))) :
dados5 := dados21..5 :
dados6 :=  $\frac{\text{dados5}}{\text{acupoints}} \cdot 100$  :
dados7 := convert(Reshape(dados1, ArrayNumElems(convert(temp3, Array))), list) :
for q from 1 by 1 to 5 do
indice := (FindMaximalElement(dados7, position))[2] :
termos5q := dados3indice :
dados7 := convert(dados7, Array) :
dados7indice := -1 :
dados7 := convert(dados7, list) :
end do:
end do:
dados5; dados6; termos5;
print(Join( ["Completed... Total of", convert(k - 2, string),
"unique pairs of terms ranked." ])) :
print("End of computation." ) :
> # Identification of top-five pairs of terms: Traditional vs.
Contemporary
> colunas := Array( ["R", "S"] ) :
termos5 := Array(1..5) :
> printlevel := 1 :
print("Reading data and determining the size of the list of pairs of terms (including
repetitions)...") :
N := 0 :
for j from 2 by 1 to acupoints + 1 do
L := convert(j, string) : C := colunas1 : cell := Join( [C, L, ":", C, L], "" ) :
temp22 := (Import("Additional file 1.xls", "Acupoints", cell))[1][1] :
if temp22 = "-" then temp111 := temp111 : else temp111 := convert(temp22, string)
end if:
temp001 := MakeUnique(convert(convert(Split(DeleteSpace(temp111), ","),
Array), list)) :
L := convert(j, string) : C := colunas2 : cell := Join( [C, L, ":", C, L], "" ) :
temp22 := (Import("Additional file 1.xls", "Acupoints", cell))[1][1] :
if temp22 = "-" then temp112 := temp112 : else temp112 := convert(temp22, string)
end if:
temp002 := MakeUnique(convert(convert(Split(DeleteSpace(temp112), ","),
Array), list)) :

```

```

    if ArrayNumElems (convert(temp001, Array))
    = 0 OR ArrayNumElems (convert(temp002, Array)) = 0 then N := N :
    elif ArrayNumElems (convert(temp001, Array))
    = 1 AND ArrayNumElems (convert(temp002, Array)) = 1 then N := N + 1 : else N
    := N + ArrayNumElems (convert(temp001, Array))
    · ArrayNumElems (convert(temp002, Array)) : end if:
end do:

print(Join(["Completed. Reading data and generating a list of pairs from", convert(N,
string), "terms (including repetitions)..."])) :
K := 1 :
Y := Array(1..N) :
for j from 2 by 1 to acupoints + 1 do
    L := convert(j, string) : C := columnas1 : cell := Join([C, L, ":", C, L], "") :
    temp21 := (Import("Additional file 1.xls", "Acupoints", cell))[1][1] :
    if temp21 = "-" then temp11 := temp11 : else temp11 := convert(temp21, string) : end
    if:
    temp01 := MakeUnique(convert(convert(Split(DeleteSpace(temp11), ","), Array),
list)) :
    L := convert(j, string) : C := columnas2 : cell := Join([C, L, ":", C, L], "") :
    temp22 := (Import("Additional file 1.xls", "Acupoints", cell))[1][1] :
    if temp22 = "-" then temp12 := temp12 : else temp12 := convert(temp22, string) : end
    if:
    temp02 := MakeUnique(convert(convert(Split(DeleteSpace(temp12), ","), Array),
list)) :
    for ii from 1 by 1 to ArrayNumElems (convert(temp01, Array)) do
        for jj from 1 by 1 to ArrayNumElems (convert(temp02, Array)) do
            a := min(temp01ii, temp02jj) :
            b := max(temp01ii, temp02jj) :
            YK := Join([a, "-", b]) :
            K := K + 1 :
        end do:
    end do:
end do:
temp3 := MakeUnique(convert(Y, list)) :
temp4 := Y :

print(Join(["Completed... Starting data analysis of",
convert(ArrayNumElems (convert(temp3, Array)), string), "pairs of terms..."])) :
for k from 1 by 1 to ArrayNumElems (convert(temp3, Array)) do
    n := 0 :
    for q from 1 by 1 to ArrayNumElems (convert(temp4, Array)) do
        if temp3k = temp4q then n := n + 1 else n := n end if:
    end do:
    output := Vectorrow ([temp3k, n]) :
    L := convert(k, string) : cell := Join(["A", L, ":", "B", L], "") :
    Export(output, "Results.xls", "list5", cell) :
end do:

print("Completed... Starting data ranking of top-five pairs of unique terms...") :

```



```

cell := Join(["B1:B", convert(ArrayNumElems(convert(temp3, Array)), string)], "") :
dados1 := Import("Results.xls", "list5", cell) :
dados2 := Statistics[Sort](Reshape(dados1, ArrayNumElems(convert(temp3,
Array))), order = descending) :
cell := Join(["A1:A", convert(ArrayNumElems(convert(temp3, Array)), string)], "") :
dados3 := Reshape(Import("Results.xls", "list5", cell),
ArrayNumElems(convert(temp3, Array))) :
dados5 := dados21..5 :
dados6 :=  $\frac{dados5}{acupoints} \cdot 100$  :
dados7 := convert(Reshape(dados1, ArrayNumElems(convert(temp3, Array))), list) :
for q from 1 by 1 to 5 do
  indice := (FindMaximalElement(dados7, position))[2] :
  termos5q := dados3indice :
  dados7 := convert(dados7, Array) :
  dados7indice := -1 :
  dados7 := convert(dados7, list) :
end do:
dados5; dados6; termos5;
print(Join(["Completed... Total of", convert(k - 1, string),
"unique pairs of terms ranked."])) :
print("End of computation.") :

```

```

> # PART 2: DATASET READING AND COMPUTATION OF SIMILARITY
INDEX AND MATRICES (DATASET SEQUENCE)
> # Loading packages...
> restart :
st := time_real() :
> with(ExcelTools) :
with(ListTools) :
with(StringTools) :
with(plots) :
with(ArrayTools) :
interface(warnlevel = 0) :
> # Variables: dermatomes (column P), traditional actions (column
R), and contemporary indications (column S) -> deterministic
> # Initializing matrices
> acupoints := 361 :
M1 := Matrix(1..acupoints, 1..acupoints) :
M2 := Matrix(1..acupoints, 1..acupoints) :
M3 := Matrix(1..acupoints, 1..acupoints) :
> # Nested "for loop" for calculation of the Jaccard coefficient
(Ja)
> printlevel := 1 :
for i from 2 by 1 to acupoints + 1 do
  print(Join(["Running acupoint #", convert(i - 1, string),
"-----"])) :

  L := convert(i, string) : C := ("P") : cell := Join([C, L, ":", C, L], "") :
  A1 := (Import("Additional file 1.xls", "Acupoints", cell))[1][1] :
  S1i := ArrayNumElems(convert(Split(DeleteSpace(A1), ","), Array)) :

  L := convert(i, string) : C := ("R") : cell := Join([C, L, ":", C, L], "") :
  B1 := (Import("Additional file 1.xls", "Acupoints", cell))[1][1] :
  S2i := ArrayNumElems(convert(Split(DeleteSpace(B1), ","), Array)) :

  L := convert(i, string) : C := ("S") : cell := Join([C, L, ":", C, L], "") :
  C1 := (Import("Additional file 1.xls", "Acupoints", cell))[1][1] :
  S3i := ArrayNumElems(convert(Split(DeleteSpace(C1), ","), Array)) :

  for j from 2 by 1 to acupoints + 1 do
    L := convert(j, string) : C := ("P") : cell := Join([C, L, ":", C, L], "") :
    A2 := (Import("Additional file 1.xls", "Acupoints", cell))[1][1] :
    S1j := ArrayNumElems(convert(Split(DeleteSpace(A2), ","), Array)) :

    L := convert(j, string) : C := ("R") : cell := Join([C, L, ":", C, L], "") :
    B2 := (Import("Additional file 1.xls", "Acupoints", cell))[1][1] :
    S2j := ArrayNumElems(convert(Split(DeleteSpace(B2), ","), Array)) :

    L := convert(j, string) : C := ("S") : cell := Join([C, L, ":", C, L], "") :
    C2 := (Import("Additional file 1.xls", "Acupoints", cell))[1][1] :
    S3j := ArrayNumElems(convert(Split(DeleteSpace(C2), ","), Array)) :

  E1 := convert(Split(DeleteSpace(Join([A1, ",", A2])), ","), list);

```

```
E2 := convert(Split(DeleteSpace(Join([B1, ",", B2])), ","), list);
E3 := convert(Split(DeleteSpace(Join([C1, ",", C2])), ","), list);
```

```
C1ij := ArrayNumElems(convert(FindRepetitions(E1), Array)) :
C2ij := ArrayNumElems(convert(FindRepetitions(E2), Array)) :
C3ij := ArrayNumElems(convert(FindRepetitions(E3), Array)) :
```

```
N1 := ArrayNumElems(convert(E1, Array)) :
N2 := ArrayNumElems(convert(E2, Array)) :
N3 := ArrayNumElems(convert(E3, Array)) :
```

```
Ja1 := evalf( $\frac{C1ij}{S1i + S1j - C1ij}$ ):
```

```
Ja2 := evalf( $\frac{C2ij}{S2i + S2j - C2ij}$ ):
```

```
Ja3 := evalf( $\frac{C3ij}{S3i + S3j - C3ij}$ ):
```

```
if i = j then M1[i - 1, j - 1] := 0 : M2[i - 1, j - 1] := 0 : M3[i - 1, j - 1] := 0 :
else M1[i - 1, j - 1] := Ja1 : M2[i - 1, j - 1] := Ja2 : M3[i - 1, j - 1] := Ja3 :
end if:
```

```
end do:
```

```
T := convert(timereal( ) - st, 'units', 'seconds', 'minutes') :
```

```
print(Join(["Processing time: ", convert(T, string), "minutos"])) :
```

```
end do:
```

```
print(Join(["-----Analyses
completed."]));
```

```
> # Storing matrices for offline analyses
```

```
> ExportMatrix("M1data.txt", M1, target = delimited, mode = ascii) :
```

```
ExportMatrix("M2data.txt", M2, target = delimited, mode = ascii) :
```

```
ExportMatrix("M3data.txt", M3, target = delimited, mode = ascii) :
```

```

> # PART 3: EXAMPLES
> # EXAMPLE 1
> # Loading packages...
> restart :
> with(ExcelTools) :
  with(StringTools) :
    interface(warnlevel = 0) :
> # Defining indexes
> i := 49 :
  j := 50 :
> # Reading files with matrices
> M1 := ImportMatrix("M1data.txt", source = delimited, datatype = numeric) :
  M2 := ImportMatrix("M2data.txt", source = delimited, datatype = numeric) :
  M3 := ImportMatrix("M3data.txt", source = delimited, datatype = numeric) :
> # Reading data
> # Selected dual acupoint
> A := Import("Additional file 1.xls", "Acupoints", Join(["C", convert(i + 1, string), ":C",
  convert(i + 1, string)], ""))[1][1] :
  B := Import("Additional file 1.xls", "Acupoints", Join(["E", convert(i + 1, string), ":E",
  convert(i + 1, string)], ""))[1][1] :
  C := Import("Additional file 1.xls", "Acupoints", Join(["D", convert(i + 1, string), ":D",
  convert(i + 1, string)], ""))[1][1] :
  acupoint1 := Join([convert(A, string), convert(B, string), convert(C, string)]);
> A := Import("Additional file 1.xls", "Acupoints", Join(["C", convert(j + 1, string), ":C",
  convert(j + 1, string)], ""))[1][1] :
  B := Import("Additional file 1.xls", "Acupoints", Join(["E", convert(j + 1, string), ":E",
  convert(j + 1, string)], ""))[1][1] :
  C := Import("Additional file 1.xls", "Acupoints", Join(["D", convert(j + 1, string), ":D",
  convert(j + 1, string)], ""))[1][1] :
  acupoint2 := Join([convert(A, string), convert(B, string), convert(C, string)]);
> # Dermatomes
> acupoint1 = Import("Additional file 1.xls", "Acupoints", Join(["P", convert(i + 1, string),
  ":P", convert(i + 1, string)], ""));
  acupoint2 = Import("Additional file 1.xls", "Acupoints", Join(["P", convert(j + 1, string),
  ":P", convert(j + 1, string)], ""));
> # Traditional actions
> acupoint1 = Import("Additional file 1.xls", "Acupoints", Join(["R", convert(i + 1, string),
  ":R", convert(i + 1, string)], ""));
  acupoint2 = Import("Additional file 1.xls", "Acupoints", Join(["R", convert(j + 1,
  string), ":R", convert(j + 1, string)], ""));
> # Contemporary indications
> acupoint1 = Import("Additional file 1.xls", "Acupoints", Join(["S", convert(i + 1, string),
  ":S", convert(i + 1, string)], ""));
  acupoint2 = Import("Additional file 1.xls", "Acupoints", Join(["S", convert(j + 1, string),
  ":S", convert(j + 1, string)], ""));
> # Coefficient J
> M1i,j;
> M2i,j;
> M3i,j;

```

```

> # EXAMPLE 2
> # Defining indexes
> i := 49 :
> j := 58 :
> # Reading data
> # Selected dual acupoint
> A := Import("Additional file 1.xls", "Acupoints", Join(["C", convert(i + 1, string), ":C",
  convert(i + 1, string)], ""))[1][1]:
> B := Import("Additional file 1.xls", "Acupoints", Join(["E", convert(i + 1, string), ":E",
  convert(i + 1, string)], ""))[1][1]:
> C := Import("Additional file 1.xls", "Acupoints", Join(["D", convert(i + 1, string), ":D",
  convert(i + 1, string)], ""))[1][1]:
> acupoint1 := Join([convert(A, string), convert(B, string), convert(C, string)]);
> A := Import("Additional file 1.xls", "Acupoints", Join(["C", convert(j + 1, string), ":C",
  convert(j + 1, string)], ""))[1][1]:
> B := Import("Additional file 1.xls", "Acupoints", Join(["E", convert(j + 1, string), ":E",
  convert(j + 1, string)], ""))[1][1]:
> C := Import("Additional file 1.xls", "Acupoints", Join(["D", convert(j + 1, string), ":D",
  convert(j + 1, string)], ""))[1][1]:
> acupoint2 := Join([convert(A, string), convert(B, string), convert(C, string)]);
> # Dermatomes
> acupoint1 = Import("Additional file 1.xls", "Acupoints", Join(["P", convert(i + 1, string),
  ":P", convert(i + 1, string)], ""));
> acupoint2 = Import("Additional file 1.xls", "Acupoints", Join(["P", convert(j + 1, string),
  ":P", convert(j + 1, string)], ""));
> # Traditional actions
> acupoint1 = Import("Additional file 1.xls", "Acupoints", Join(["R", convert(i + 1, string),
  ":R", convert(i + 1, string)], ""));
> acupoint2 = Import("Additional file 1.xls", "Acupoints", Join(["R", convert(j + 1,
  string), ":R", convert(j + 1, string)], ""));
> # Contemporary indications
> acupoint1 = Import("Additional file 1.xls", "Acupoints", Join(["S", convert(i + 1, string),
  ":S", convert(i + 1, string)], ""));
> acupoint2 = Import("Additional file 1.xls", "Acupoints", Join(["S", convert(j + 1, string),
  ":S", convert(j + 1, string)], ""));
> # Coefficient J
> M1i,j;
> M2i,j;
> M3i,j;

```

```

> # PART 4: READING AND COMPUTATION OF ASSOCIATION TABLES
> # Loading packages...
> restart :
> with(ExcelTools) :
with(ListTools) :
with(StringTools) :
with(plots) :
with(ArrayTools) :
with(LinearAlgebra) :
interface(warnlevel = 0) :
> acupoints := 361 :
> classes := 6 :
> Digits := 3 :
> # Reading files with matrices
> M1 := ImportMatrix("M1data.txt", source = delimited, datatype = numeric) :
M2 := ImportMatrix("M2data.txt", source = delimited, datatype = numeric) :
M3 := ImportMatrix("M3data.txt", source = delimited, datatype = numeric) :
> # Filling the main diagonal
> for i from 1 by 1 to acupoints do
for j from 1 by 1 to acupoints do
if i = j then M1[i,j] := 1 : M2[i,j] := 1 : M3[i,j] := 1 : end if:
end do:
end do:
> # Definition of empty arrays for M12, M13, and M23
> M12 := Matrix(1..classes, 1..classes) :
M13 := Matrix(1..classes, 1..classes) :
M23 := Matrix(1..classes, 1..classes) :
> # Nested "for loop" for generation of 2D-Histograms
> # Dermatomes and traditional actions
> x := -1 : y := -1 :
for i from 1 by 1 to acupoints do
for j from 1 by 1 to acupoints do
for k from 1 by 1 to classes do
if  $\frac{k-1}{classes} \leq M1_{i,j} < \frac{k}{classes}$  then x := k : end if:
if  $\frac{k-1}{classes} \leq M2_{i,j} < \frac{k}{classes}$  then y := k : end if:
end do:
if i ≠ j then M12x,y := M12x,y + 1 : end if:
end do:
end do:
> # Calculation of concordance and discordance in paired
observations (diagonal removed)
> M12;
concordante := 0 :
for i from 1 by 1 to classes do
for j from 1 by 1 to classes do
a := M12i,j; b := M12i+1..classes,j+1..classes; c := add(add(b[m,n], m = 1..classes
- i), n = 1..classes - j);

```

```

    concordante := concordante + a*c;
  end do:
end do:
discordante := 0 :
for i from 1 by 1 to classes do
  for j from 1 by 1 to classes do
    a := M12i, classes - j + 1; b := M12i + 1 ..classes, 1 ..classes - j; c := add(add(b[m, n], m
      = 1 ..classes - i), n = 1 ..classes - j);
    discordante := discordante + a*c;
  end do:
end do:
GKgammaM12 := evalf( (concordante - discordante) / (concordante + discordante) ); RgammaM12
:= evalf( (sqrt(concordante) - sqrt(discordante)) / sqrt(concordante + discordante) ); R2likeM12 := RgammaM122;

```

> # Dermatomes and contemporary indications

```

> x := -1 : y := -1 :
for i from 1 by 1 to acupoints do
  for j from 1 by 1 to acupoints do
    for k from 1 by 1 to classes do
      if  $\frac{k-1}{classes} \leq M1_{i,j} < \frac{k}{classes}$  then x := k : end if:
      if  $\frac{k-1}{classes} \leq M3_{i,j} < \frac{k}{classes}$  then y := k : end if:
    end do:
    if i ≠ j then M13x,y := M13x,y + 1 : end if:
  end do:
end do:

```

> # Calculation of concordance and discordance in paired observations (diagonal removed)

```

> M13;
concordante := 0 :
for i from 1 by 1 to classes do
  for j from 1 by 1 to classes do
    a := M13i,j; b := M13i + 1 ..classes, j + 1 ..classes; c := add(add(b[m, n], m = 1 ..classes
      - i), n = 1 ..classes - j);
    concordante := concordante + a*c;
  end do:
end do:
discordante := 0 :
for i from 1 by 1 to classes do
  for j from 1 by 1 to classes do
    a := M13i, classes - j + 1; b := M13i + 1 ..classes, 1 ..classes - j; c := add(add(b[m, n], m
      = 1 ..classes - i), n = 1 ..classes - j);
    discordante := discordante + a*c;
  end do:
end do:
GKgammaM13 := evalf( (concordante - discordante) / (concordante + discordante) ); RgammaM13

```

```

:= evalf( ( sqrt(concordante) - sqrt(discordante) ) / sqrt(concordante + discordante) ); R2likeM13 := RgammaM132;
> # Traditional actions and contemporary indications
> x := -1 : y := -1 :
for i from 1 by 1 to acupoints do
  for j from 1 by 1 to acupoints do
    for k from 1 by 1 to classes do
      if  $\frac{k-1}{classes} \leq M2_{i,j} < \frac{k}{classes}$  then x := k : end if:
      if  $\frac{k-1}{classes} \leq M3_{i,j} < \frac{k}{classes}$  then y := k : end if:
    end do:
    if i ≠ j then M23x,y := M23x,y + 1 : end if:
  end do:
end do:
> # Calculation of concordance and discordance in paired
observations (diagonal removed)
> M23;
concordante := 0 :
for i from 1 by 1 to classes do
  for j from 1 by 1 to classes do
    a := M23i,j; b := M23i+1..classes,j+1..classes; c := add(add(b[m,n], m = 1..classes
      - i), n = 1..classes - j);
    concordante := concordante + a·c;
  end do:
end do:
discordante := 0 :
for i from 1 by 1 to classes do
  for j from 1 by 1 to classes do
    a := M23i,classes-j+1; b := M23i+1..classes,1..classes-j; c := add(add(b[m,n], m
      = 1..classes - i), n = 1..classes - j);
    discordante := discordante + a·c;
  end do:
end do:
GKgammaM23 := evalf( ( concordante - discordante ) / ( concordante + discordante ) ); RgammaM23
:= evalf( ( sqrt(concordante) - sqrt(discordante) ) / sqrt(concordante + discordante) ); R2likeM23 := RgammaM232;
> # Storing matrices...
> ExportMatrix("M12data.txt", M12, target = delimited, mode = ascii) :
ExportMatrix("M13data.txt", M13, target = delimited, mode = ascii) :
ExportMatrix("M23data.txt", M23, target = delimited, mode = ascii) :
> # Saving results...
> labels := Matrix(1..(classes + 1), 1..(classes + 1)) :
for k from 1 by 1 to classes do
  x :=  $\frac{k-1}{classes}$  : y :=  $\frac{k}{classes}$  :
  labels1,k+1 := Join([convert(evalf(x), string), "|-", convert(evalf(y), string)]) :
  labelsk+1,1 := labels1,k+1 :

```



**end do:**

```
> variaveis := Vector_row(["Goodman-Kruskal gamma", "Rousson gamma", "R2-like"]) :  
results1 := Vector_row([GKgammaM12, RgammaM12, R2likeM12]) :  
results2 := Vector_row([GKgammaM13, RgammaM13, R2likeM13]) :  
results3 := Vector_row([GKgammaM23, RgammaM23, R2likeM23]) :  
  
> Export(labels, "Results.xls", "GKgammaM12", "A1") :  
Export(M12, "Results.xls", "GKgammaM12", "B2") :  
Export(variaveis, "Results.xls", "GKgammaM12", "I1") :  
Export(results1, "Results.xls", "GKgammaM12", "I2") :  
  
> Export(labels, "Results.xls", "GKgammaM13", "A1") :  
Export(M13, "Results.xls", "GKgammaM13", "B2") :  
Export(variaveis, "Results.xls", "GKgammaM13", "I1") :  
Export(results2, "Results.xls", "GKgammaM13", "I2") :  
  
> Export(labels, "Results.xls", "GKgammaM23", "A1") :  
Export(M23, "Results.xls", "GKgammaM23", "B2") :  
Export(variaveis, "Results.xls", "GKgammaM23", "I1") :  
Export(results3, "Results.xls", "GKgammaM23", "I2") :
```

```

> # PART 5A: READING FOR BOOTSTRAP RESAMPLING AND
ANALYSIS OF GOODMAN-KRUSKAL GAMMA AND EXPLAINED
VARIANCE
> # Loading packages...
> restart :
> with(ExcelTools) :
with(ListTools) :
with(StringTools) :
with(plots) :
with(ArrayTools) :
with(LinearAlgebra) :
interface(warnlevel = 0) :
with(DynamicSystems) :
> acupoints := 361 :
> classes := 6 :
> # Reading files with matrices
> Lini := convert(2, string) : Lfim := convert(acupoints + 1, string) : C := ("P") : cell
:= Join([C, Lini, ":", C, Lfim], "") :
DERM := (Import("Additional file 1.xls", "Acupoints", cell)) :
M1 := ImportMatrix("M1data.txt", source = delimited, datatype = numeric) :
M2 := ImportMatrix("M2data.txt", source = delimited, datatype = numeric) :
M3 := ImportMatrix("M3data.txt", source = delimited, datatype = numeric) :
> # Filling the main diagonal
> for i from 1 by 1 to acupoints do
for j from 1 by 1 to acupoints do
if i = j then M1[i,j] := 1 : M2[i,j] := 1 : M3[i,j] := 1 : end if:
end do:
end do:
> # Analysis by dermatome level
> # Generating unique dermatome levels combinations
> LEVEL := convert(sort(MakeUnique(convert(DERM, list))), Array) :
N := ArrayNumElems(LEVEL) :
> # "For loop" for sorting acupoints by first dermatome level
> rank := Array(1..acupoints) :
freq := Array(1..N) :
> for i from 1 by 1 to acupoints do
for j from 1 by 1 to N do
if evalb(DERM[i][1] = LEVEL_j) = true then freq_j := freq_j + 1; rank_i := j else freq_j
= freq_j; rank_i := rank_i : end if:
end do:
end do:
> rankM1 := Matrix(1..acupoints, 1..acupoints) :
rankM2 := Matrix(1..acupoints, 1..acupoints) :
rankM3 := Matrix(1..acupoints, 1..acupoints) :
> rankI := rank :
for i from 1 by 1 to acupoints do
for j from 1 by 1 to acupoints do
rankM1_i,j := M1[(max(rankI[i], rankI[j])), (min(rankI[i], rankI[j]))];
rankM2_i,j := M2[(max(rankI[i], rankI[j])), (min(rankI[i], rankI[j]))];

```

```

    rankM3i,j := M3[(max(rankI[i], rankI[j])), (min(rankI[i], rankI[j]))];
  end do:
end do:
> # Initializing the bootstrap procedure on the ranked matrix
  (previously sorted by dermatome)
> # Real sample size
> N := acupoints :
> # Repeat this sorting B times (idealy: B = 1000 or more)
> B := 1000 :
> # Storing column headers in Excel;
> header := Vectorrow(["Goodman-Kruskal gamma", "Rousson gamma", "R2-like"]) :
Export(header, "Results.xls", "M12", "A1") :
Export(header, "Results.xls", "M13", "A1") :
Export(header, "Results.xls", "M23", "A1") :
> # Definition of empty arrays for bivariate analysis
> M12 := Matrix(1 ..classes, 1 ..classes) :
M13 := Matrix(1 ..classes, 1 ..classes) :
M23 := Matrix(1 ..classes, 1 ..classes) :
> # M12: Dermatomes vs. Traditional Indications
> # Nested loops for bootstrap calculations (# Dermatomes and
  traditional actions: sampling N dual acupoints with replacement
  B times)
> printlevel := 1 : st := timereal( ) :
> for q from 1 by 1 to B do
  x := -1 : y := -1 : Seed := randomize( ) :
  for n from 1 by 1 to N2 do
    L1 := RandomTools[Generate](integer(range = 1 ..acupoints)); L2
      := RandomTools[Generate](integer(range = 1 ..acupoints));
    for k from 1 by 1 to classes do
      if  $\frac{k-1}{classes} \leq M1_{L1, L2} < \frac{k}{classes}$  then x := k : end if:
      if  $\frac{k-1}{classes} \leq M2_{L1, L2} < \frac{k}{classes}$  then y := k : end if:
    end do:
    if L1 ≠ L2 then M12x,y := M12x,y + 1 : end if:
  end do:
  concordante := 0 :
  for i from 1 by 1 to classes do
    for j from 1 by 1 to classes do
      a := M12i,j; b := M12i+1 ..classes, j+1 ..classes; c := add(add(b[m, n], m = 1
        ..classes - i), n = 1 ..classes - j);
      concordante := concordante + a·c;
    end do:
  end do:
  discordante := 0 :
  for i from 1 by 1 to classes do
    for j from 1 by 1 to classes do
      a := M12i, classes - j + 1; b := M12i+1 ..classes, 1 ..classes - j; c := add(add(b[m, n],
        m = 1 ..classes - i), n = 1 ..classes - j);

```

```

    discordante := discordante + a·c;
  end do;
end do;

GKgammaM12 := evalf( ( concordante - discordante ) / ( concordante + discordante ) ): RgammaM12
:= evalf( ( sqrt(concordante) - sqrt(discordante) ) / ( sqrt(concordante + discordante) ) ): R2likeM12 := RgammaM122 :
results1 := Vectorrow( [ GKgammaM12, RgammaM12, R2likeM12 ] ) :
Export(results1, "Results.xls", "M12", StringTools[DeleteSpace](Join(["A", convert(q
+ 1, string)]))) :
T := convert(timereal( ) - st, 'units', 'seconds', 'minutes') :
print(Join([convert(q, string), "Duração do processamento: ", convert(T, string),
"minutos"]));
end do;

```

```
> # M13: Dermatomes vs. Contemporary Indications
```

```
> # Nested loops for bootstrap calculations (# Dermatomes and
contemporary actions: sampling N dual acupoints with
replacement B times)
```

```
> printlevel := 1 : st := timereal( ) :
```

```
> for q from 1 by 1 to B do
```

```
  x := -1 : y := -1 : Seed := randomize( ) :
```

```
  for n from 1 by 1 to N2 do
```

```
    L1 := RandomTools[Generate](integer(range = 1 ..acupoints)); L2
```

```
    := RandomTools[Generate](integer(range = 1 ..acupoints));
```

```
    for k from 1 by 1 to classes do
```

```
      if  $\frac{k-1}{classes} \leq M1_{L1, L2} < \frac{k}{classes}$  then x := k : end if:
```

```
      if  $\frac{k-1}{classes} \leq M3_{L1, L2} < \frac{k}{classes}$  then y := k : end if:
```

```
    end do;
```

```
    if L1 ≠ L2 then M13x,y := M13x,y + 1 : end if:
```

```
  end do;
```

```
  concordante := 0 :
```

```
  for i from 1 by 1 to classes do
```

```
    for j from 1 by 1 to classes do
```

```
      a := M13i,j; b := M13i+1..classes, j+1..classes; c := add(add(b[m, n], m = 1
```

```
      ..classes - i), n = 1 ..classes - j);
```

```
      concordante := concordante + a·c;
```

```
    end do;
```

```
  end do;
```

```
  discordante := 0 :
```

```
  for i from 1 by 1 to classes do
```

```
    for j from 1 by 1 to classes do
```

```
      a := M13i, classes - j + 1; b := M13i+1..classes, 1..classes - j; c := add(add(b[m, n],
```

```
      m = 1 ..classes - i), n = 1 ..classes - j);
```

```
      discordante := discordante + a·c;
```

```
    end do;
```

```
  end do;
```

```

GKgammaM13 := evalf( ( concordante - discordante ) / ( concordante + discordante ) ): RgammaM13
:= evalf( ( sqrt(concordante) - sqrt(discordante) ) / ( sqrt(concordante) + sqrt(discordante) ) ): R2likeM13 := RgammaM13^2 :
results2 := Vector_row([ GKgammaM13, RgammaM13, R2likeM13 ]):
Export(results2, "Results.xls", "M13", StringTools[DeleteSpace](Join(["A", convert(q
+ 1, string)]))):
T := convert(time_real() - st, 'units', 'seconds', 'minutes'):
print(Join([convert(q, string), "Duração do processamento: ", convert(T, string),
"minutos"]));

```

end do:

> # M23: Traditional Indications vs. Contemporary Indications

> # Nested loops for bootstrap calculations (# traditional and contemporary actions: sampling N dual acupoints with replacement B times)

> printlevel := 1 : st := time\_real() :

> for q from 1 by 1 to B do

x := -1 : y := -1 : Seed := randomize() :

for n from 1 by 1 to N<sup>2</sup> do

L1 := RandomTools[Generate](integer(range = 1 ..acupoints)); L2

:= RandomTools[Generate](integer(range = 1 ..acupoints));

for k from 1 by 1 to classes do

if  $\frac{k-1}{classes} \leq M2_{L1, L2} < \frac{k}{classes}$  then x := k : end if:

if  $\frac{k-1}{classes} \leq M3_{L1, L2} < \frac{k}{classes}$  then y := k : end if:

end do:

if L1 ≠ L2 then M23<sub>x,y</sub> := M23<sub>x,y</sub> + 1 : end if:

end do:

concordante := 0 :

for i from 1 by 1 to classes do

for j from 1 by 1 to classes do

a := M23<sub>i,j</sub>; b := M23<sub>i+1 ..classes, j+1 ..classes</sub>; c := add(add(b[m, n], m = 1 ..classes - i), n = 1 ..classes - j);

concordante := concordante + a·c;

end do:

end do:

discordante := 0 :

for i from 1 by 1 to classes do

for j from 1 by 1 to classes do

a := M23<sub>i, classes - j + 1</sub>; b := M23<sub>i+1 ..classes, 1 ..classes - j</sub>; c := add(add(b[m, n], m = 1 ..classes - i), n = 1 ..classes - j);

discordante := discordante + a·c;

end do:

end do:

GKgammaM23 := evalf( ( concordante - discordante ) / ( concordante + discordante ) ): RgammaM23

```

:= evalf( ( sqrt(concordante) - sqrt(discordante) ) / sqrt(concordante + discordante) ): R2likeM23 := RgammaM23^2 :
results3 := Vector_row([ GKgammaM23, RgammaM23, R2likeM23 ]):
Export(results3, "Results.xls", "M23", StringTools[DeleteSpace](Join(["A", convert(q
+ 1, string)]))):
T := convert(time_real() - st, 'units', 'seconds', 'minutes'):
print(Join([convert(q, string), "Duração do processamento: ", convert(T, string),
"minutos"]));
end do:

```

```
> # PART 5B: DATA ANALYSES OF BOOTSTRAP
SAMPLES (CALCULATION OF CONFIDENCE INTERVAL)
```

```
> restart :
```

```
st := timereal( ) :
```

```
decimais := 3 :
```

```
> # Read data from Excel to estimate R2 and CI95%
```

```
> with(ExcelTools) :
```

```
with(StringTools) :
```

```
with(LinearAlgebra) :
```

```
with(DynamicSystems) :
```

```
with(ArrayTools) :
```

```
with(plots) :
```

```
> # Quantity of matrices to test
```

```
> MODEL := 3 :
```

```
> # Repeat this sorting B times (idealy: B = 1000 or more)
```

```
> B := 1000 :
```

```
> # Definition of the confidence interval
```

```
>  $\alpha$  := 0.05 :
```

```
> # Defining variables
```

```
>  $\theta$  := Matrix(1..B, 1..1) :
```

```
colunas := ("A", "B", "C") :
```

```
Labels1 := Matrix(["M12", "M13", "M23"]) :
```

```
Labels2 := Matrix(["Dermatomes vs. Traditional indications",  
"Dermatomes vs. Contemporary indications",  
"Traditional vs. Contemporary indications"]) :
```

```
Labels1 := Labels1[1] :
```

```
Labels2 := Labels2[1] :
```

```
header := Vectorrow(["Goodman-Kruskal gamma", "Rousson gamma", "R2-like"]) :
```

```
HISTO := Matrix(1..MODEL, 1..3) :
```

```
> # Defining X-axis limits of histograms
```

```
> minimo := Array(1..MODEL) :
```

```
maximo := Array(1..MODEL) :
```

```
> for i from 1 by 1 to MODEL do
```

```
    L := convert(2, string) : C := convert(colunasi, string) : cell := Join([C, L, ":", C,  
    convert(B + 1, string)], "") :
```

```
    temp1 := Import("Results.xls", "M12", cell) :
```

```
    L := convert(2, string) : C := convert(colunasi, string) : cell := Join([C, L, ":", C,  
    convert(B + 1, string)], "") :
```

```
    temp2 := Import("Results.xls", "M13", cell) :
```

```
    L := convert(2, string) : C := convert(colunasi, string) : cell := Join([C, L, ":", C,  
    convert(B + 1, string)], "") :
```

```
    temp3 := Import("Results.xls", "M23", cell) :
```

```
    minimoi := min(Concatenate(1, temp1, temp2, temp3)) : maximoi
```

```
        := max(Concatenate(1, temp1, temp2, temp3)) :
```

```
end do:
```

```
> # Reading data for generation of histograms and confidence  
intervals
```

```

> resultado := Matrix(1..MODEL*3, 1..5) :
> infolevel[Statistics] := 1 :
k := 1 :
for i from 1 by 1 to MODEL do
  for j from 1 by 1 to 3 do
    cells := DeleteSpace(Join([convert(colunasi, string), "2:", colunasi, convert(B + 1,
      string)])) :
    θ := sort(convert((Import("Results.xls", Labels1j, cells))1..B, 1, Vector[column])) :
    Statistics[ShapiroWilkWTest](θ, level = α) :
    mediana := convert(Statistics[Median](θ), float, decimais) :
    low := convert(θfloor(B·(α/2)), float, decimais) :
    up := convert(θceil(B·(1 - α/2)), float, decimais) :
    results := StringTools[Join]([convert(Labels1j, string), ":", convert(headeri, string),
      "=", convert(mediana, string), " CI95%=[" convert(low, string), " ", convert(up,
      string), "]" ]) :
    resultadok, 1 := Labels1j : resultadok, 2 := headeri : resultadok, 3 := mediana :
    resultadok, 4 := low : resultadok, 5 := up :
    HISTOj, i := Statistics[Histogram](θ, title = Labels2j, labels = [headeri, "Frequency (%)
      "], axesfont = [ARIAL, bold, 12], labelfont = [ARIAL, bold, 14], titlefont = [ARIAL,
      bold, 16], labeldirections = ["horizontal", "vertical"], color = gray, range = minimoi
      ..maximoi) :
    print(results);
    display(HISTOj, 1);
    k := k + 1 :
  end do:
end do:
> Export(Vectorrow(["Model", "Parameter", "Median", "Low 95%CI", "High 95%CI"]),
  "Results.xls", "bootstrap", "A1") :
Export(resultado, "Results.xls", "bootstrap", "A2") :
> # Plots - Arrays of histograms
> plotsetup(bmp, plotoutput = `Figure1.bmp`, plotoptions
  = `landscape, noborder, height=1500, width=1500`) :
display(HISTO);
plotsetup(default) :
display(HISTO);

```



```

> # PART 6A: READING FOR BOOTSTRAP RESAMPLING AND
ANALYSIS OF CONFIDENCE INTERVAL FOR GOODMAN-KRUSKAL
GAMMA AND EXPLAINED VARIANCE (PERMUTATION TEST)
> # Loading packages...
> restart :
> with(ExcelTools) :
with(ListTools) :
with(StringTools) :
with(plots) :
with(ArrayTools) :
with(LinearAlgebra) :
interface(warnlevel = 0) :
with(DynamicSystems) :
> acupoints := 361 :
> classes := 6 :
> # Reading files with matrices
> Lini := convert(2, string) : Lfim := convert(acupoints + 1, string) : C := ("P") : cell
:= Join([C, Lini, ":", C, Lfim], "") :
DERM := (Import("Additional file 1.xls", "Acupoints", cell)) :
M1 := ImportMatrix("M1data.txt", source = delimited, datatype = numeric) :
M2 := ImportMatrix("M2data.txt", source = delimited, datatype = numeric) :
M3 := ImportMatrix("M3data.txt", source = delimited, datatype = numeric) :
> # Filling the main diagonal
> for i from 1 by 1 to acupoints do
for j from 1 by 1 to acupoints do
if i = j then M1[i,j] := 1 : M2[i,j] := 1 : M3[i,j] := 1 : end if:
end do:
end do:
> # Analysis by dermatome level
> # Generating unique dermatome levels combinations
> LEVEL := convert(sort(MakeUnique(convert(DERM, list))), Array) :
N := ArrayNumElems(LEVEL) :
> # "For loop" for sorting acupoints by first dermatome level
> rank := Array(1..acupoints) :
freq := Array(1..N) :
> for i from 1 by 1 to acupoints do
for j from 1 by 1 to N do
if evalb(DERM[i][1] = LEVEL_j) = true then freq_j := freq_j + 1; rank_i := j else freq_j
= freq_j; rank_i := rank_i : end if:
end do:
end do:
> rankM1 := Matrix(1..acupoints, 1..acupoints) :
rankM2 := Matrix(1..acupoints, 1..acupoints) :
rankM3 := Matrix(1..acupoints, 1..acupoints) :
> rankI := rank :
for i from 1 by 1 to acupoints do
for j from 1 by 1 to acupoints do
rankM1_i,j := M1[(max(rankI[i], rankI[j])), (min(rankI[i], rankI[j]))];
rankM2_i,j := M2[(max(rankI[i], rankI[j])), (min(rankI[i], rankI[j]))];

```

```

rankM3i,j := M3[(max(rankI[i], rankI[j])), (min(rankI[i], rankI[j]))];
end do:
end do:
> # Initializing the bootstrap procedure on the ranked matrix
  (previously sorted by dermatome)
> # Real sample size
> N := acupoints :
> # Repeat this sorting B times (idealy: B = 1000 or more)
> B := 1000 :
> # Storing column headers in Excel;
> header := Vectorrow(["Goodman-Kruskal gamma", "Rousson gamma", "R2-like"]);
Export(header, "Results.xls", "M12perm", "A1");
Export(header, "Results.xls", "M13perm", "A1");
Export(header, "Results.xls", "M23perm", "A1");
> # Definition of empty arrays for bivariate analysis
> M12 := Matrix(1..classes, 1..classes);
M13 := Matrix(1..classes, 1..classes);
M23 := Matrix(1..classes, 1..classes);
> # M12: Dermatomes vs. Traditional Indications
> # Nested loops for bootstrap calculations (# Dermatomes and
  traditional actions: sampling N dual acupoints with replacement
  B times)
> printlevel := 1 : st := timereal( ):
> for q from 1 by 1 to B do
  x := -1 : y := -1 : Seed := randomize( ):
  for n from 1 by 1 to N2 do
    L1 := RandomTools[Generate](integer(range = 1..acupoints)); L2
      := RandomTools[Generate](integer(range = 1..acupoints)); L3
      := RandomTools[Generate](integer(range = 1..acupoints)); L4
      := RandomTools[Generate](integer(range = 1..acupoints));
    for k from 1 by 1 to classes do
      if  $\frac{k-1}{classes} \leq M1_{L1, L2} < \frac{k}{classes}$  then x := k : end if:
      if  $\frac{k-1}{classes} \leq M2_{L3, L4} < \frac{k}{classes}$  then y := k : end if:
    end do:
    if (L1 ≠ L2 AND L3 ≠ L4) then M12x,y := M12x,y + 1 : end if:
  end do:
  concordante := 0 :
  for i from 1 by 1 to classes do
    for j from 1 by 1 to classes do
      a := M12i,j; b := M12i+1..classes, j+1..classes; c := add(add(b[m, n], m = 1
        ..classes - i), n = 1..classes - j);
      concordante := concordante + a·c;
    end do:
  end do:
  discordante := 0 :
  for i from 1 by 1 to classes do
    for j from 1 by 1 to classes do

```

```

    a := M12i, classes - j + 1 : b := M12i + 1 ..classes, 1 ..classes - j; c := add(add(b[m, n],
    m = 1 ..classes - i), n = 1 ..classes - j);
    discordante := discordante + a·c;
  end do:
end do:
GKgammaM12 := evalf( ( concordante - discordante / concordante + discordante ) : RgammaM12
:= evalf( ( sqrt(concordante) - sqrt(discordante) / sqrt(concordante + discordante) ) : R2likeM12 := RgammaM122 :
results1 := Vectorrow( [ GKgammaM12, RgammaM12, R2likeM12 ] ) :
Export(results1, "Results.xls", "M12perm", StringTools[DeleteSpace](Join(["A",
convert(q + 1, string)]))) :
T := convert(timereal( ) - st, 'units', 'seconds', 'minutes') :
print(Join([convert(q, string), "Duração do processamento: ", convert(T, string),
"minutos"]));
end do:

```

```
> # M13: Dermatomes vs. Contemporary Indications
```

```
> # Nested loops for bootstrap calculations (# Dermatomes and
contemporary actions: sampling N dual acupoints with
replacement B times)
```

```
> printlevel := 1 : st := timereal( ) :
```

```
> for q from 1 by 1 to B do
```

```
  x := -1 : y := -1 : Seed := randomize( ) :
```

```
  for n from 1 by 1 to N2 do
```

```
    L1 := RandomTools[Generate](integer(range = 1 ..acupoints)); L2
```

```
    := RandomTools[Generate](integer(range = 1 ..acupoints)); L3
```

```
    := RandomTools[Generate](integer(range = 1 ..acupoints)); L4
```

```
    := RandomTools[Generate](integer(range = 1 ..acupoints));
```

```
  for k from 1 by 1 to classes do
```

```
    if  $\frac{k-1}{classes} \leq M1_{L1, L2} < \frac{k}{classes}$  then x := k : end if:
```

```
    if  $\frac{k-1}{classes} \leq M3_{L3, L4} < \frac{k}{classes}$  then y := k : end if:
```

```
  end do:
```

```
  if L1 ≠ L2 then M13x, y := M13x, y + 1 : end if:
```

```
end do:
```

```
concordante := 0 :
```

```
for i from 1 by 1 to classes do
```

```
  for j from 1 by 1 to classes do
```

```
    a := M13i, j; b := M13i + 1 ..classes, j + 1 ..classes; c := add(add(b[m, n], m = 1
    ..classes - i), n = 1 ..classes - j);
```

```
    concordante := concordante + a·c;
```

```
  end do:
```

```
end do:
```

```
discordante := 0 :
```

```
for i from 1 by 1 to classes do
```

```
  for j from 1 by 1 to classes do
```

```
    a := M13i, classes - j + 1 : b := M13i + 1 ..classes, 1 ..classes - j; c := add(add(b[m, n],
    m = 1 ..classes - i), n = 1 ..classes - j);
```

```

    discordante := discordante + a·c;
  end do;
end do;

GKgammaM13 := evalf( ( concordante - discordante ) / ( concordante + discordante ) ): RgammaM13
:= evalf( ( sqrt(concordante) - sqrt(discordante) ) / ( sqrt(concordante + discordante) ) ): R2likeM13 := RgammaM132 :
results2 := Vectorrow( [ GKgammaM13, RgammaM13, R2likeM13 ] ) :
Export(results2, "Results.xls", "M13perm", StringTools[DeleteSpace](Join(["A",
convert(q + 1, string)]))) :
T := convert(timereal( ) - st, 'units', 'seconds', 'minutes') :
print(Join([convert(q, string), "Duração do processamento: ", convert(T, string),
"minutos"]));

```

end do:

> # M23: Traditional Indications vs. Contemporary Indications

> # Nested loops for bootstrap calculations (# traditional and contemporary actions: sampling N dual acupoints with replacement B times)

> printlevel := 1 : st := time<sub>real</sub>( ) :

> for q from 1 by 1 to B do

x := -1 : y := -1 : Seed := randomize( ) :

for n from 1 by 1 to N<sup>2</sup> do

L1 := RandomTools[Generate](integer(range = 1 ..acupoints)); L2

:= RandomTools[Generate](integer(range = 1 ..acupoints)); L3

:= RandomTools[Generate](integer(range = 1 ..acupoints)); L4

:= RandomTools[Generate](integer(range = 1 ..acupoints));

for k from 1 by 1 to classes do

if  $\frac{k-1}{classes} \leq M2_{L1, L2} < \frac{k}{classes}$  then x := k : end if:

if  $\frac{k-1}{classes} \leq M3_{L3, L4} < \frac{k}{classes}$  then y := k : end if:

end do:

if (L1 ≠ L2 AND L3 ≠ L4) then M23<sub>x,y</sub> := M23<sub>x,y</sub> + 1 : end if:

end do:

concordante := 0 :

for i from 1 by 1 to classes do

for j from 1 by 1 to classes do

a := M23<sub>i,j</sub>; b := M23<sub>i+1 ..classes, j+1 ..classes</sub>; c := add(add(b[m, n], m = 1 ..classes - i), n = 1 ..classes - j);

concordante := concordante + a·c;

end do:

end do:

discordante := 0 :

for i from 1 by 1 to classes do

for j from 1 by 1 to classes do

a := M23<sub>i, classes - j + 1</sub>; b := M23<sub>i+1 ..classes, 1 ..classes - j</sub>; c := add(add(b[m, n], m = 1 ..classes - i), n = 1 ..classes - j);

discordante := discordante + a·c;

```

end do:
end do:
GKgammaM23 := evalf( $\frac{\text{concordante} - \text{discordante}}{\text{concordante} + \text{discordante}}$ ): RgammaM23
:= evalf( $\frac{\text{sqrt}(\text{concordante}) - \text{sqrt}(\text{discordante})}{\text{sqrt}(\text{concordante} + \text{discordante})}$ ): R2likeM23 := RgammaM232 :
results3 := Vectorrow([GKgammaM23, RgammaM23, R2likeM23]):
Export(results3, "Results.xls", "M23perm", StringTools[DeleteSpace](Join(["A",
convert(q + 1, string)]))) :
T := convert(timereal( ) - st, 'units', 'seconds', 'minutes') :
print(Join([convert(q, string), "Duração do processamento: ", convert(T, string),
"minutos"]));
end do:

```

```
> # PART 6B: DATA ANALYSES OF BOOTSTRAP
SAMPLES (CONFIDENCE INTERVAL OF PERMUTATION
TEST)
```

```
> restart :
st := timereal( ) :
decimais := 3 :
```

```
> # Read data from Excel to estimate R2 and CI95%
```

```
> with(ExcelTools) :
with(StringTools) :
with(LinearAlgebra) :
with(DynamicSystems) :
with(ArrayTools) :
with(plots) :
```

```
> # Quantity of matrices to test
```

```
> MODEL := 3 :
```

```
> # Repeat this sorting B times (idealy: B = 1000 or more)
```

```
> B := 1000 :
```

```
> # Definition of the confidence interval
```

```
>  $\alpha$  := 0.05 :
```

```
> # Defining variables
```

```
>  $\theta$  := Matrix(1..B, 1..1) :
colunas := ("A", "B", "C") :
Labels1 := Matrix(["M12perm", "M13perm", "M23perm"]) :
Labels2 := Matrix(["Dermatomes vs. Traditional indications",
"Dermatomes vs. Contemporary indications",
"Traditional vs. Contemporary indications"]) :
Labels1 := Labels1[1] :
Labels2 := Labels2[1] :
header := Vectorrow(["Goodman-Kruskal gamma", "Rousson gamma", "R2-like"]) :
HISTO := Matrix(1..MODEL, 1..3) :
```

```
> # Defining axes limits of histograms
```

```
> minimo := Array(1..MODEL) :
maximo := Array(1..MODEL) :
```

```
> for i from 1 by 1 to MODEL do
```

```
    L := convert(2, string) : C := convert(colunasi, string) : cell := Join([C, L, ":", C,
    convert(B + 1, string)], "") :
```

```
    temp1 := Import("Results.xls", "M12perm", cell) :
```

```
    L := convert(2, string) : C := convert(colunasi, string) : cell := Join([C, L, ":", C,
    convert(B + 1, string)], "") :
```

```
    temp2 := Import("Results.xls", "M13perm", cell) :
```

```
    L := convert(2, string) : C := convert(colunasi, string) : cell := Join([C, L, ":", C,
    convert(B + 1, string)], "") :
```

```
    temp3 := Import("Results.xls", "M23perm", cell) :
```

```
    minimoi := min(Concatenate(1, temp1, temp2, temp3)) : maximoi
    := max(Concatenate(1, temp1, temp2, temp3)) :
```

```
end do:
```

```
> # Reading data for generation of histograms
```

```

> resultado := Matrix(1..MODEL*3, 1..5) :
> infolevel[Statistics] := 1 :
k := 1 :
for i from 1 by 1 to MODEL do
  for j from 1 by 1 to 3 do
    cells := DeleteSpace(Join([convert(colunasi, string), "2:", colunasi, convert(B + 1,
      string)])) :
     $\theta$  := sort(convert((Import("Results.xls", Labels1j, cells))1..B, 1, Vector[column])) :
    Statistics[ShapiroWilkWTest]( $\theta$ , level =  $\alpha$ ) :
    mediana := convert(Statistics[Median]( $\theta$ ), float, decimais) :
    low := convert( $\theta$ 
      floor( $B \cdot \left(\frac{\alpha}{2}\right)$ ), float, decimais) :
    up := convert( $\theta$ 
      ceil( $B \cdot \left(1 - \frac{\alpha}{2}\right)$ ), float, decimais) :
    results := StringTools[Join]([convert(Labels1j, string), ":", convert(headeri, string),
      "=", convert(mediana, string), " CI95%=[" , convert(low, string), " ,", convert(up,
      string), "]" ]) :
    resultadok, 1 := Labels1j : resultadok, 2 := headeri : resultadok, 3 := mediana :
    resultadok, 4 := low : resultadok, 5 := up :
    HISTOj, i := Statistics[Histogram]( $\theta$ , title = Labels2j, labels = [headeri, "Frequency (%)
      "], axesfont = [ARIAL, bold, 12], labelfont = [ARIAL, bold, 14], titlefont = [ARIAL,
      bold, 16], labeldirections = ["horizontal", "vertical"], color = gray, range = minimoi
      ..maximoi) :
    print(results);
    display(HISTOj, i);
    k := k + 1 :
  end do:
end do:
> Export(Vectorrow(["Model", "Parameter", "Median", "Low 95%CI", "High 95%CI"]),
  "Results.xls", "permutation", "A1") :
Export(resultado, "Results.xls", "permutation", "A2") :
> # Plots - Arrays of histograms
> plotsetup(bmp, plotoutput = `Figure2.bmp`, plotoptions
  = `landscape, noborder, height=1500, width=1500`) :
display(HISTO);
plotsetup(default) :
display(HISTO);

```

```

> # PART 7: READING AND COMPUTATION OF P-VALUES BETWEEN
BOOTSTRAP AND PERMUTATION TESTS
> # Loading packages...
> restart :
> with(ExcelTools) :
with(ListTools) :
with(StringTools) :
with(plots) :
with(ArrayTools) :
with(LinearAlgebra) :
interface(warnlevel = 0) :
> # Quantity of matrices to test
> MODEL := 3 :
> # Repeat this sorting B times (idealy: B = 1000 or more)
> B := 1000 :
> # Reading data with calculated G-K-gamma
> M12 $\gamma_{calculated}$  := Import("Results.xls", "GKgammaM12", "I2:I2")[1][1] :
M13 $\gamma_{calculated}$  := Import("Results.xls", "GKgammaM13", "I2:I2")[1][1] :
M23 $\gamma_{calculated}$  := Import("Results.xls", "GKgammaM23", "I2:I2")[1][1] :
> # Reading data with bootstrap resampling
> M12 $\gamma_{bootstrap}$  := Import("Results.xls", "bootstrap", "C2:C2")[1][1] :
M13 $\gamma_{bootstrap}$  := Import("Results.xls", "bootstrap", "C3:C3")[1][1] :
M23 $\gamma_{bootstrap}$  := Import("Results.xls", "bootstrap", "C4:C4")[1][1] :
> # Reading data with permuted resampling
> M12 $\gamma_{permutation}$  := Import("Results.xls", "permutation", "C2:C2")[1][1] :
M13 $\gamma_{permutation}$  := Import("Results.xls", "permutation", "C3:C3")[1][1] :
M23 $\gamma_{permutation}$  := Import("Results.xls", "permutation", "C4:C4")[1][1] :
> # Reading files and calculation of P-values (calculated versus
permutation)
> n1 := 0 : n2 := 0 : n3 := 0 :
for i from 1 by 1 to B do
  data12 := (Import("Results.xls", "M12perm", Join(["A", convert(i + 1, string), ":" ,
"A", convert(i + 1, string)], "")))[1][1] :
  data13 := (Import("Results.xls", "M13perm", Join(["A", convert(i + 1, string), ":" ,
"A", convert(i + 1, string)], "")))[1][1] :
  data23 := (Import("Results.xls", "M23perm", Join(["A", convert(i + 1, string), ":" ,
"A", convert(i + 1, string)], "")))[1][1] :
  if data12 > M12 $\gamma_{calculated}$  then n1 := n1 + 1 : end if:
  if data13 > M13 $\gamma_{calculated}$  then n2 := n2 + 1 : end if:
  if data23 > M23 $\gamma_{calculated}$  then n3 := n3 + 1 : end if:
end do:

$$P_{M12, calcXpermut} := evalf\left(\frac{n1}{B}, 3\right); P_{M13, calcXpermut} := evalf\left(\frac{n2}{B}, 3\right); P_{M23, calcXpermut}$$

:= evalf\left(\frac{n3}{B}, 3\right);

```



```
> # Reading files and calculation of P-values among matrices  
(bootstrap versus bootstrap)
```

```
> n1 := 0 : n2 := 0 : n3 := 0 :
```

```
for i from 1 by 1 to B do
```

```
  data12 := (Import("Results.xls", "M12", Join(["A", convert(i + 1, string), ":", "A",  
  convert(i + 1, string)], "")))[1][1] :
```

```
  data13 := (Import("Results.xls", "M13", Join(["A", convert(i + 1, string), ":", "A",  
  convert(i + 1, string)], "")))[1][1] :
```

```
  data23 := (Import("Results.xls", "M23", Join(["A", convert(i + 1, string), ":", "A",  
  convert(i + 1, string)], "")))[1][1] :
```

```
  if data13 > M23 $\gamma_{bootstrap}$  then n1 := n1 + 1 : end if:
```

```
  if data12 > M23 $\gamma_{bootstrap}$  then n2 := n2 + 1 : end if:
```

```
  if data12 > M13 $\gamma_{bootstrap}$  then n3 := n3 + 1 : end if:
```

```
end do:
```

```
 $P_{M23, M13} := evalf\left(\frac{n1}{B}, 3\right); P_{M23, M12} := evalf\left(\frac{n2}{B}, 3\right); P_{M13, M12} := evalf\left(\frac{n3}{B}, 3\right);$ 
```

```
 $P_{M23, M13} := 0.$ 
```

```
 $P_{M23, M12} := 0.$ 
```

```
 $P_{M13, M12} := 0.$ 
```

(1)

```

> # PART 8: READING AND COMPUTATION OF SIMILARITY
  MATRICES AND BINARY MAPS (DERMATOME SEQUENCE)
> # Loading packages...
> restart :
> with(ExcelTools) :
  with(ListTools) :
  with(StringTools) :
  with(plots) :
  with(ArrayTools) :
  with(LinearAlgebra) :
  interface(warnlevel = 0) :
> acupoints := 361 :
> # Reading files with matrices
> Lini := convert(2, string) : Lfim := convert(acupoints + 1, string) : C := ("P") : cell
  := Join([C, Lini, ":", C, Lfim], "") :
  DERM := (Import("Additional file 1.xls", "Acupoints", cell)) :
  M1 := ImportMatrix("M1data.txt", source = delimited, datatype = numeric) :
  M2 := ImportMatrix("M2data.txt", source = delimited, datatype = numeric) :
  M3 := ImportMatrix("M3data.txt", source = delimited, datatype = numeric) :
> # Filling the main diagonal
> for i from 1 by 1 to acupoints do
  for j from 1 by 1 to acupoints do
    if i = j then M1[i, j] := 1 : M2[i, j] := 1 : M3[i, j] := 1 : end if:
  end do:
end do:
> # Analysis by dermatome level
> # Generating unique dermatome levels combinations
> LEVEL := convert(sort(MakeUnique(convert(DERM, list))), Array) :
  N := ArrayNumElems(LEVEL) :
> # "For loop" for sorting acupoints by first dermatome level
> rank := Array(1..acupoints) :
  freq := Array(1..N) :
> for i from 1 by 1 to acupoints do
  for j from 1 by 1 to N do
    if evalb(DERM[i][1] = LEVEL_j) = true then freq_j := freq_j + 1; rank_i := j else freq_j
      = freq_j; rank_i := rank_i : end if:
  end do:
end do:
> rankM1 := Matrix(1..acupoints, 1..acupoints) :
  rankM2 := Matrix(1..acupoints, 1..acupoints) :
  rankM3 := Matrix(1..acupoints, 1..acupoints) :
  surrM1 := Matrix(1..acupoints, 1..acupoints) :
  surrM2 := Matrix(1..acupoints, 1..acupoints) :
  surrM3 := Matrix(1..acupoints, 1..acupoints) :
> rank1 := rank :
  for i from 1 by 1 to acupoints do
  for j from 1 by 1 to acupoints do
    rankM1_{i,j} := M1[(max(rank1[i], rank1[j])), (min(rank1[i], rank1[j]))];
    rankM2_{i,j} := M2[(max(rank1[i], rank1[j])), (min(rank1[i], rank1[j]))];

```

```

    rankM3i,j := M3[(max(rank1[i], rank1[j])), (min(rank1[i], rank1[j]))];
  end do:
end do:
> # Permutation test (surrogate analysis): Random ordering
  (shuffle of acupoints for comparison to the sorted matrices)
> rank2 := Statistics[Shuffle](rank) :
  for i from 1 by 1 to acupoints do
    for j from 1 by 1 to acupoints do
      surrM1i,j := M1[(max(rank2[i], rank2[j])), (min(rank2[i], rank2[j]))];
      surrM2i,j := M2[(max(rank2[i], rank2[j])), (min(rank2[i], rank2[j]))];
      surrM3i,j := M3[(max(rank2[i], rank2[j])), (min(rank2[i], rank2[j]))];
    end do:
  end do:
> # Plotting array of 2D-matrices
> AA := Array(1..2, 1..3) :
AA1,1 := matrixplot(rankM1, style = surface, shading = zgrayscale, title
= ["Similarity on dermatomes\n"], labels = ["Acupoint", "Acupoint", ""],
labeldirections = ["vertical", "horizontal", "vertical"], font = [ARIAL, 13, BOLD], axes
= normal, orientation = [0, 0, 0]) :
AA1,2 := matrixplot(rankM2, style = surface, shading = zgrayscale, title
= ["Similarity on traditional actions\n(dermatome sequence)"], labels = ["Acupoint",
"Acupoint", ""], labeldirections = ["vertical", "horizontal", "vertical"], font = [ARIAL,
13, BOLD], axes = normal, orientation = [0, 0, 0]) :
AA1,3 := matrixplot(rankM3, style = surface, shading = zgrayscale, title
= ["Similarity on contemporary indications\n"], labels = ["Acupoint", "Acupoint", ""],
labeldirections = ["vertical", "horizontal", "vertical"], font = [ARIAL, 13, BOLD], axes
= normal, orientation = [0, 0, 0]) :
AA2,1 := matrixplot(surrM1, style = surface, shading = zgrayscale, title
= ["Similarity on dermatomes\n"], labels = ["Acupoint", "Acupoint", ""],
labeldirections = ["vertical", "horizontal", "vertical"], font = [ARIAL, 13, BOLD], axes
= normal, orientation = [0, 0, 0]) :
AA2,2 := matrixplot(surrM2, style = surface, shading = zgrayscale, title
= ["Similarity on traditional actions\n(after permutation)"], labels = ["Acupoint",
"Acupoint", ""], labeldirections = ["vertical", "horizontal", "vertical"], font = [ARIAL,
13, BOLD], axes = normal, orientation = [0, 0, 0]) :
AA2,3 := matrixplot(surrM3, style = surface, shading = zgrayscale, title
= ["Similarity on contemporary indications\n"], labels = ["Acupoint", "Acupoint", ""],
labeldirections = ["vertical", "horizontal", "vertical"], font = [ARIAL, 13, BOLD], axes
= normal, orientation = [0, 0, 0]) :
> display(AA);
> # End of routine

```
